# Supplementary material for: Ultrasound stimulation of piezoelectric nanocomposite hydrogels boosts cartilage regeneration
Source: Research Square preprint supplement (doi:10.21203/rs.3.rs-2326785/v1), 2022-11-30
Supplement: Supplementary file 1 [file 0c9eaa872264a5b5b250bad8.docx]

**Supplementary information**

**Ultrasound stimulation of piezoelectric nanocomposite hydrogels boosts cartilage regeneration**

Leonardo Ricotti1,2, Andrea Cafarelli1,2,#, Cristina Manferdini3,#, Diego Trucco1,2,3,#, Lorenzo Vannozzi1,2,#, Elena Gabusi3, Francesco Fontana1,2, Paolo Dolzani3, Yasmin Saleh3, Enrico Lenzi3, Marta Columbaro4, Manuela Piazzi5,6, Jessika Bertacchini7 Andrea Aliperta1,2, Markys Cain8, Mauro Gemmi9, Paola Parlanti9, Carsten Jost10, Yirij Fedutik10, Gilbert Daniel Nessim11, Madina Telkhozhayeva11, Eti Teblum11, Erik Dumont12, Chiara Delbaldo13, Giorgia Codispoti13, Lucia Martini13, Matilde Tschon13, Milena Fini14, and Gina Lisignoli3

1 - The BioRobotics Institute, Scuola Superiore Sant’Anna, Piazza Martiri della Libertà 33, 56127 Pisa, Italy

2 - Department of Excellence in Robotics & AI, Scuola Superiore Sant’Anna, Piazza Martiri della Libertà 33, 56127 Pisa, Italy

3 – IRCCS Istituto Ortopedico Rizzoli, Laboratorio di Immunoreumatologia e Rigenerazione Tissutale, 40136 Bologna, Italy

4 - IRCCS Istituto Ortopedico Rizzoli, Piattaforma di Microscopia Elettronica, 40136 Bologna, Italy

5 - Istituto di Genetica Molecolare ''Luigi Luca Cavalli-Sforza'', Consiglio Nazionale delle Ricerca (IGM-CNR), 40136 Bologna, Italy.

6 - IRCCS Istituto Ortopedico Rizzoli, 40136 Bologna, Italy

7 - Department of Surgery, Medicine, Dentistry and Morphological Sciences with Interest in Transplant, Oncology and Regenerative Medicine, University of Modena and Reggio Emilia, Modena 41125, Italy

8 - Electrosciences Ltd, Farnham, Surrey GU9 9QT, UK

9 - Istituto Italiano di Tecnologia, Center for Materials Interfaces, Electron Crystallography, Viale Rinaldo Piaggio 34, 56025 Pontedera, Italy

10 - PlasmaChem GmbH, Schwarzschildstraße 10, 12489 Berlin, Germany

11 - Department of Chemistry and Institute of Nanotechnology, Bar-Ilan University, Ramat Gan 52900, Israel

12 - Image Guided Therapy, 33600 Pessac, France

13 - IRCCS Istituto Ortopedico Rizzoli, Struttura Complessa Scienze e Tecnologie Chirurgiche, via di Barbiano 1/10, 40136 Bologna, Italy

14 –IRCCS Istituto Ortopedico Rizzoli, Scientific Director, via di Barbiano 1/10, 40136 Bologna, Italy

# = equally contributing authors

**Section S1**

**Description and discussion of GO nanoflake and BTNP characterization results**

We first found that BTNPs were featured by an average diameter of ~ 60 nm, a specific surface area of ~ 9.4 m2/g, and a series of peaks in the Raman spectrum typical of a tetragonal structure (**Fig. 1b**, **Extended Data Fig. 1a,b**). They showed good piezoelectricity, with a d33 coefficient of ~ 118.6 pm/V (**Fig. 1c**, **Extended data Fig. 1c**). To enhance their stability in an aqueous solution and thus facilitate their homogeneous embodiment into the hydrogel, BTNPs were coated with propylene glycol alginate (PGA) (**Extended data Fig. 1d**). XPS measurements confirmed the presence of PGA on the coated samples, highlighted by the higher intensity of the C and O elements, due to the presence of PGA carboxyl, hydroxyl and ester groups (**Extended data Fig. 1e**). The coated BTNPs showed a smaller hydrodynamic radius than the non-coated counterparts (median value of 245 nm *vs*. 2130 nm in water and 217 nm *vs.* 2064 nm in DMEM on day 0), and a zeta potential of -23.8 mV once coated *vs*. -11.8 mV of the uncoated ones in water, supporting the presence of the polymer wrapped around the particles. Indeed, the use of PGA promoted a homogeneous dispersion of BTNPs during the sonication phase, whereas uncoated particles tended to remain aggregated in clusters with a size bigger than 1000 nm. The coated BTNPs showed an excellent stability in water and DMEM over 7 days (**Extended data Fig. 1f**).

Viability tests on human chondrocytes (DNA quantification, metabolic activity and LDH release) were performed with the coated BTNPs, highlighting their safety, even at high concentrations (up to 100 µg/mL) (**Extended data Fig. 1g-j**). PGA has been recently proposed as an FDA-approved coating for BTNPs1. Here we reported for the first time a complete XPS and DLS characterization, as well as its cytocompatibility with human chondrocytes.

Then, we synthesized and characterized GO nanoflakes having a lateral size of 8.8 ± 4.6 µm and a thickness of 1.6 ± 0.7 nm (**Fig. 1d**). To enhance their stability in aqueous solution and thus facilitate their homogeneous embodiment in the hydrogel, GO nanoflakes were coated with polydopamine (**Extended data Fig. 2a**). As expected2, XPS measurements suggested that the polydopamine covered the surface of GO, noticeable by the presence of the C–N peak (**Extended data Fig. 2b**). The coated nanomaterials showed a smaller hydrodynamic radius than the non-coated counterparts (median of 1789 nm *vs.* 3021 nm in water and 1786 nm *vs.* 2831 nm in DMEM on day 0), which slightly increased after 3 and 7 days, yet keeping a smaller size than the uncoated nanoflakes. The zeta potential of the coated GO resulted -22.2 mV, *vs.* -54.5 mV for the uncoated GO, also confirming the presence of the coating with the polydopamine, which contributed with a positive charge to the overall nanoflakes zeta potential. The polydopamine also guaranteed higher stability of the nanoflakes over time (**Extended data Fig. 2c**). Polydopamine-coated GO nanoflakes showed excellent safety on human chondrocytes in terms of DNA quantification, metabolic activity and LDH release, up to 25 µg/mL (**Extended data Fig. 2d-g**).

**Section S2**

**Analytical model of the interaction between piezoelectric nanomaterials and ultrasound waves**

To model the interaction between a US wave and a BTNP, the simplified situation depicted in **Fig. 2c** was considered. Here, a BTNP is immersed in water and experiences a hydrostatic pressure variation caused by a travelling pressure wave (plane wave), in which the particle is positioned in the far field of the transducer. The BTNP experiences a time-varying pressure gradient that exerts a stress through the particle. Such stress changes the particle shape. A volumetric strain can be imagined, in this case, represented by a spherical BTNP changing its diameter by a small amount.

If the BTNP is piezoelectric, then the change in shape will produce a net dielectric displacement proportional to the piezo coefficient and the external stress, with a consequent internal distribution of charges

To allow us to rapidly assess and understand the impact of changing some of the materials parameters on piezoelectric voltage outcomes for individual piezoelectric BTNPs, undergoing a homogeneous acoustic pressure field, we used a modeling approach based on the Gauss law.

The Gauss law states that the electric flux (Φ) calculated through a closed surface (A) at a certain distance r from the center of a spherically symmetrical charge distribution is related to the total internal charge (Q) and the material permittivity (ε) as:

With E, electrical field and εR and ε0 relative dielectric constant and vacuum dielectric constant, respectively (ε = εR ε0).

In addition, the material's hydrostatic piezoelectric coefficient (dh) was used as functional parameter related to its other tensor properties according to dh=d33+2d31, where the subscripts, p and q in dpq relate to polarization direction (or strain) in the direction p per unit stress (or field) applied in the q direction, based on the usual convention. The piezoelectric coefficient dh is related to the surface charge density and stress as follows:

where A1 is the surface area of the BTNP charged sphere, and PUS is the pressure generated by the US wave. Hence on the BTNP surface (r=R):

This equation can be then used to explore the voltage (V = E r) that would be generated at a radial distance (r = R) of a BTNP experiencing the pressure exerted by a US wave.

The model is based on some basic assumptions, justified in the following ways: *i)* a constant hydrostatic pressure surrounding the BTNP, based on the size of the nanoparticle (60nm) compared to the wavelength of the acoustic radiation (mm scale); *ii)* a linear piezoelectric response experienced by BTNPs with the applied stress based on the low hydrostatic pressures typical of LIPUS, considerably lower than any onset of deviation away from linear behavior3; and *iii)* piezoelectric and dielectric isotropy associated with piezo particles, which is justified based on the randomized nature of the final composite, which acts to average out any anisotropy in the (single) crystal particles properties. Future embodiments of the model can incorporate some or all of these non-linearities for example modifying the piezo tensor and dielectric tensor to include anisotropy or non-linear Rayleigh-like characteristics, or to introduce elements of non-perfect electrical insulation (assumed here) that has been shown to modify the dynamics of the electrical charges generated on the surface of piezoelectrics experiencing dynamic changes in stress.

The developed model shows results in good agreement with the model developed by Marino et al.4, and that were obtained from FEM simulations (**Fig. 2e**).

.

**Section S3**

**Analysis of TEM images to provide input data to the FEM simulations**

The following analysis was performed to estimate the average distribution of BTNPs in a 2D section of a representative ASC. These data were used as input for the FEM simulations, to calculate the voltage generated by the ultrasound-induced piezo response in the cells laden in the nanocomposite hydrogel.

Nine sections, obtained from different ASCs were considered in this regard (**Fig. S1**), to estimate the following parameters: *i)* cell average diameter, *ii)* number of BTNP clusters, and *iii)* cluster dimension (number of particles within the clusters, as shown in **Fig. S2**). For each ASC under investigation, different TEM images were acquired by using a Jeol Jem 1011 transmission electron microscope operated at 100kV.


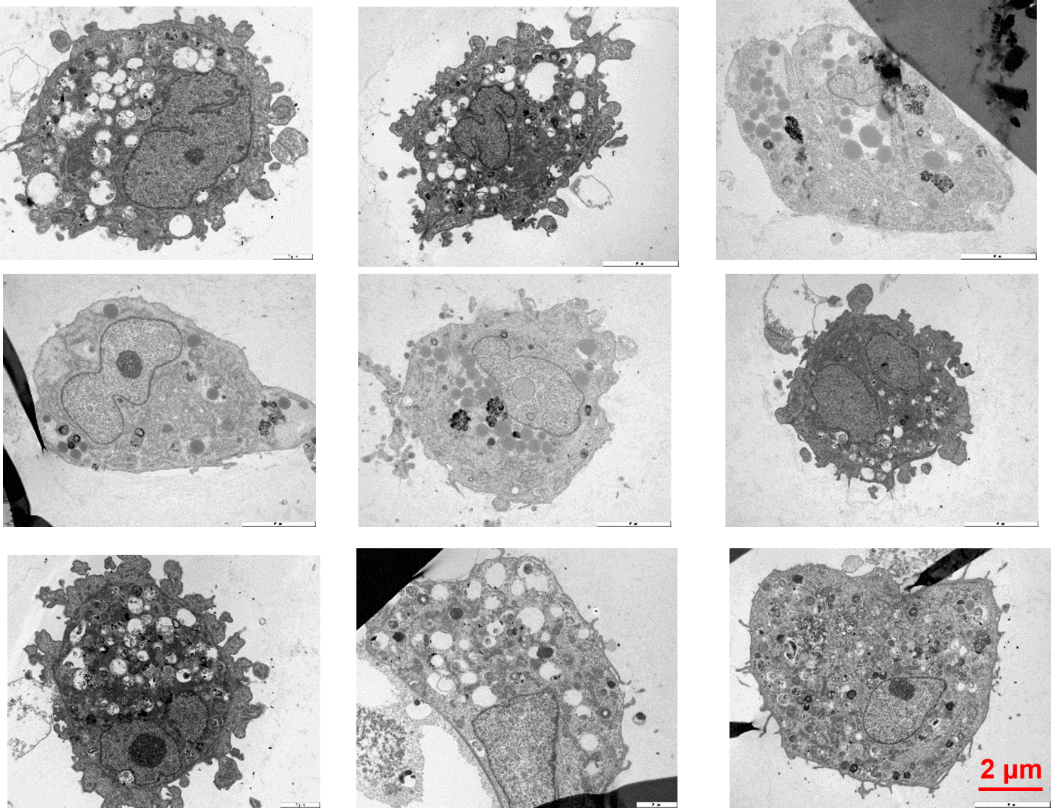


Fig. S1. TEM images (80 nm-thick) of 9 ASCs. Piezoelectric nanoparticles are clearly visible within all the cells and distributed in clusters with different dimensions


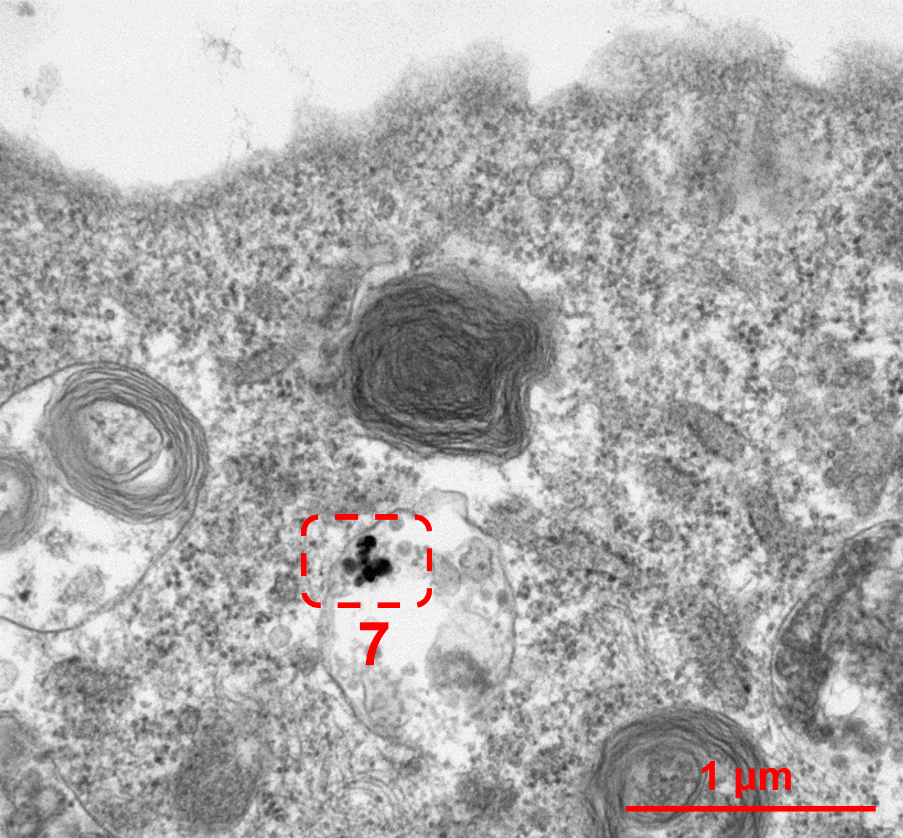


Fig. S2. Example of a zoomed image of ASC cytoplasm, in which a single cluster of BTNPs can be identified and the nanoparticles in it can be counted.

The mean value of the ASC diameter was 13 μm. The analysis also identified an average of 17 clusters inside the cytoplasm, having different dimensions. **Table S1** summarizes the sizes of such clusters in terms of the number of BTNPs forming each aggregation. In particular, four single BTNPs resulted, on average, isolated and not aggregated; the other ones created particle clusters having up to 50 elements.

| Cluster dimension (Number of particles) | 1 | 2 | 3 | 4 | 5 | 6 | 7 | 10 | 15 | 50 |  |
| --- | --- | --- | --- | --- | --- | --- | --- | --- | --- | --- | --- |
| Number of clusters with that dimension found in the cell | x4 | x2 | x2 | x3 | x1 | x1 | x1 | x1 | x1 | x1 | **TOT=17** |

Table S1: Number of BTNP clusters found in the ASCs and cluster dimensions (in terms of number of particles constituting them).

Starting from these considerations, the BTNPs and associated clusters were randomly distributed within the great circle of a sphere of 13 μm representing an ASC. A representative visualization is shown in **Fig. S3**. The analysis was performed on a representative 2D plane in which all the 17 clusters were randomly located.

Indeed, assuming that the proportion of the area occupied by the particles in a 2D section is an unbiased estimate of its relative volume5, this would introduce about 20,000 particles into the model, which is computationally very expensive to solve.

However, even if the centers of the clusters were placed in one representative plane, the clusters were simulated three-dimensionally (cubic close packing), because particles located in close planes could contribute to the electric potential in the selected plane. And since these additional particles contribute more to the voltage generated in the selected plane with respect to other particles dispersed in the cell volume, we believe that this 3D to 2D simplification is both pragmatic and realistic being the simulation of voltages in any plane of the clusters a fair representation of the voltage anywhere in the cell volume


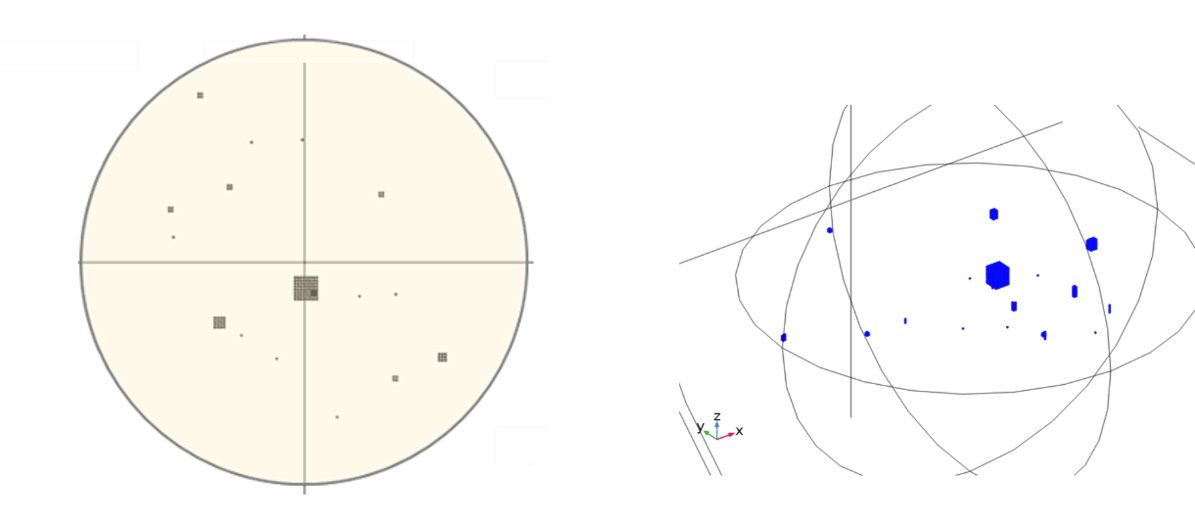


Fig. S3. 2D (left) and 3D (right) visualization of the average distribution of BTNPs in a representative 2D section within an ASC.

**Section S4**

**Results of the proteomic analysis**

**Table S2** shows the detailed list of up-regulated, down-regulated and unique proteins found in the “nanocomp + US” samples with respect to the “nanocomp – US” ones.

|  | **Gene Name** | **Fold**  **change** |  | **Gene Name** |
| --- | --- | --- | --- | --- |
| **Up-regulated in the “nanocomp + US” samples** | HLAA | +5.74 | **Proteins found uniquely in the “nanocomp + US” samples** | ANGPTL1 |
| HSPE1 | +5.29 | AP2A2 |
| MFGE8 | +4.29 | CAVIN3 |
| RPLP1 | +4.22 | CYP1B1 |
| B2M | +4.19 | CROCC |
| ITGA5 | +4.19 | CRYAB |
| FKBP7 | +3.95 | DDTL |
| NDRG1 | +3.79 | DDX49 |
| PFKP | +3.79 | ENO2 |
| ALCAM | +3.59 | ERO1A |
| GBE1 | +3.59 | GNAL |
| **Down-regulated in the “nanocomp + US” samples** | ILF3 | -3.06 | SLC2A1 |
| EIF2S3 | -3.06 | H2BC11 |
| RPL22 | -3.15 | ISG15 |
| BGN | -3.15 | MANF |
| DHX9 | -3.16 | MAP1A |
| PTK7 | -3.16 | MAT1A |
| HNRNPL | -3.16 | MT1E |
| PSMD6 | -3.16 | MVP |
| SEC23A | -3.34 | DLST |
| COLGALT1 | -3.34 | SERPINE1 |
| PSMD3 | -3.34 | PAPSS2 |
| IKBIP | -3.40 | PDIA5 |
| PDIA4 | -3.47 | PPP1CA |
| RPS18 | -3.80 | RAB11A |
| ARCN1 | -3.82 | RHOA |
| TSN | -3.82 | SEPTIN6 |
| PSMA2 | -3.90 | SETSIP |
| CORO1C | -4.14 | SOD2 |
| RPL24 | -4.38 | SRSF1 |
| RPL5 | -4.66 | TUBB2B |
| CLIC1 | -4.75 | TBCA |
| LUM | -5.04 |  |  |
| AKR1A1 | -5.27 |  |  |
| GLUD1 | -5.85 |  |  |
| CCT5 | -6.03 |  |  |
| COL11A1 | -6.41 |  |  |
| HSPG2 | -7.24 |  |  |

Table S2: Up- and down regulated proteins resulting from spectral counting analysis from the nanocomp + US and nanocomp – US comparison. The proteins listed in column 5 are the ones uniquely found in the nanocomp + US samples.

The enrichment of differentially expressed proteins and the ones uniquely identified in the nanocomp+US samples confirmed that cells were committed to chondrogenic differentiation (*e.g.*, negative regulation of cell proliferation, negative regulation of G2/M transition of mitotic cell cyle). Terms related to mechano-signaling were significantly enriched (**Extended data Fig. 8a**), for instance, regulation of focal adhesion and ECM organization. Other pathways that play a role in the mechano-signaling processes were enriched after the US stimulation, such as those related to cell migration, regulation of PAK2p34, NOTCH4, TNFR2/NFkB (**Extended data Fig. 8b**). Interestingly, ITGA5, a protein involved in the regulation of focal adhesion and ECM organization was considerably up-regulated in the nanocomposite + US samples; ITGA activates FAK and thus the downstream signaling pathways PI3K/Akt, WNT and MAPK, balancing cellular homeostasis between cell proliferation and cell survival6.

**Section S5**

**Results of the AMES test (mutagenic potential)**

The detailed results of the AMES test, aimed at assessing the mutagenic potential of the nanocomposite hydrogel, are reported in **Table S3** (without metabolic activation) and **Table S4** (with metabolic activation).

| **Ames without metabolic activation** | **TA98** | | **TA100** | | **TA1535** | | **TA1537** | | ***E.coli uvrA*** | |
| --- | --- | --- | --- | --- | --- | --- | --- | --- | --- | --- |
| **n. revertants** | **fold increase** | **n. revertants** | **fold increase** | **n. revertants** | **fold increase** | **n. revertants** | **fold increase** | **n. revertants** | **fold increase** |
| **NC** | 1.00±0.00 |  | 4.00±1.73 |  | 1.33±0.58 |  | 1.33±0.58 |  | 1.33±1.15 |  |
| **C1** | 1.67±2.08 | 1.67 | 3.67±1.53 | 0.64 | 1.33±1.53 | 0.70 | 0.00±0.00 | 0.00 | 2.67±0.58 | 1.07 |
| **C2** | 0.33±0.58 | 0.33 | 5.00±2.00 | 0.87 | 0.67±1.15 | 0.35 | 1.33±0.58 | 0.70 | 1.33±0.58 | 0.54 |
| **C3** | 1.67±0.58 | 1.67 | 3.33±1.53 | 0.58 | 1.00±1.00 | 0.52 | 1.33±0.58 | 0.70 | 2.33±1.15 | 0.94 |
| **C4** | 1.00±0.00 | 1.00 | 3.33±2.31 | 0.58 | 1.00±1.73 | 0.52 | 2.00±1.00 | 1.05 | 3.00±2.00 | 1.21 |
| **C5** | 0.33±0.58 | 0.33 | 1.00±1.00 | 0.17 | 2.00±1.00 | 1.05 | 1.00±1.73 | 0.52 | 4.33±2.31 | 1.74 |
| **C6** | 1.00±0.00 | 1.00 | 3.67±2.08 | 0.64 | 1.00±1.00 | 0.52 | 1.67±2.08 | 0.87 | 3.00±2.65 | 1.21 |
| **ND** | 0.50±0.71 | 0.50 | 6.00±4.24 | 0.52 | 1.50±0.71 | 0.68 | 0.50±0.71 | 0.23 | 2.00±1.41 | 1.00 |
| **PC** | 48.00±0.00 | 48.00 | 48.00±0.00 | 8.37 | 44.67±5.77 | 23.38 | 48.00±0.00 | 25.12 | 34.00±4.24 | 17.00 |

Table S3: Mutagenic potential of different concentrations of nanocomposite hydrogel, assessed through the Ames test using *S. Typhimurium* strains TA98, TA100, TA1535 and TA1537 and *E. coli uvrA* [pKM101] strain, in absence of metabolic activation. The number of revertant colonies is expressed as mean value ± standard deviation (n = 3). The fold increase is calculated over the baseline. Mutagens yielding a fold increase over the baseline greater than 2.0 are red colored. NC: negative control; PC : positive control (2 μg/mL 2-nitrofluorene for the TA98; 0.1 and 2 μg/mL 4-nitroquinoline-N-oxide for the TA100 and *E. coli uvrA*, respectively; 100 μg/mL N4-aminocytidine for the TA1535; and 15 μg/mL 9-aminoacridine for the TA1537). C1-6: serial concentrations of nanocomposite hydrogel (C1: 0.03125X; C2: 0.0625X; C3: 0.125X; C4: 0.25X; C5: 0.5X and C6: 1X); ND: nanocomposite hydrogel non disgregated.

| **Ames with metabolic activation** | **TA98** | | **TA100** | | **TA1535** | | **TA1537** | | ***E.coli uvrA*** | |
| --- | --- | --- | --- | --- | --- | --- | --- | --- | --- | --- |
| **n. revertants** | **fold increase** | **n. revertants** | **fold increase** | **n. revertants** | **fold increase** | **n. revertants** | **fold increase** | **n. revertants** | **fold increase** |
| **NC** | 0.67±0.58 |  | 5.00±2.83 |  | 1.00±1.00 |  | 1.00±1.00 |  | 9.00±2.65 |  |
| **C1** | 1.00±1.00 | 0.80 | 6.50±0.71 | 0.83 | 0.67±1.15 | 0.33 | 1.67±0.58 | 0.83 | 9.00±7.00 | 0.85 |
| **C2** | 0.67±0.58 | 0.54 | 5.50±0.71 | 0.70 | 2.00±1.00 | 1.00 | 2.00±1.73 | 1.00 | 9.00±4.00 | 0.85 |
| **C3** | 0.33±0.58 | 0.27 | 4.00±1.41 | 0.51 | 0.33±0.58 | 0.17 | 1.67±0.58 | 0.83 | 7.00±1.73 | 0.66 |
| **C4** | 2.00±1.00 | 1.61 | 4.50±3.54 | 0.57 | 1.67±1.53 | 0.83 | 1.33±1.53 | 0.67 | 7.33±1.53 | 0.69 |
| **C5** | 2.33±0.58 | 1.88 | 11.00±0.00 | 1.41 | 0.67±1.15 | 0.33 | 0.67±0.58 | 0.33 | 6.33±3.06 | 0.59 |
| **C6** | 1.00±1.00 | 0.80 | 10.00±2.83 | 1.28 | 2.00±1.00 | 1.00 | 1.67±1.53 | 0.83 | 9.33±3.06 | 0.88 |
| **ND** | 1.50±0.71 | 1.24 | 6.50±0.71 | 0.83 | 1.50±2.12 | 0.62 | 2.50±2.12 | 1.04 | 2.00±1.41 | 0.59 |
| **PC** | 48.00±0.00 | 38.58 | 48.00±0.00 | 6.13 | 48.00±0.00 | 24.00 | 40.00±3.00 | 20.00 | 47.67±0.58 | 4.48 |

Table S4: Mutagenic potential of different concentrations of nanocomposite hydrogel, assessed through the Ames test using *S. Typhimurium* strains TA98, TA100, TA1535 and TA1537 and *E. coli uvrA* [pKM101] strain, in presence of metabolic activation. The number of revertant colonies is expressed as mean value ± standard deviation (n = 3). The fold increase is calculated over the baseline. Mutagens yielding a fold increase over the baseline greater than 2.0 are red colored. NC: negative control; PC : positive control (1 μg/mL 2-aminoanthracene for the TA98 strain, 2.5 μg/mL 2-aminoanthracene for the TA100, TA1535 and TA1537 strains and 400 μg/mL 2-aminofluorene for the *E. coli uvrA* strain). C1-6: serial concentrations of nanocomposite hydrogel (C1: 0.03125X; C2: 0.0625X; C3: 0.125X; C4: 0.25X; C5: 0.5X and C6: 1X); ND: nanocomposite hydrogel non disgregated.

**Section S6**

**Results of the micronuclei test**

The detailed results of the micronuclei test are reported in **Table S5**.

|  | **Short-exposure (3 h)** | | **Long-exposure (24 h)** | |
| --- | --- | --- | --- | --- |
| **RPD** | **MN** | **RPD** | **MN** |
| **Negative CTR** | 100.00 ± 0.00 | 3.69 ± 1.45 | 100.00 ± 0.00 | 1.67 ± 0.91 |
| **Nanocomp 0.75X** | 85.3 ± 4.40 | 3.97 ± 2.95 | 76.60 ± 0.50 | 3.50 ± 0.64 |
| **Nanocomp 1X** | 68.00 ± 0.00 | 6.35 ± 1.87 | 78.80 ± 0.80 | 3.23 ± 1.10 |
| **Nanocomp 1.25X** | 63.40 ± 5.10 | 4.92 ± 1.66 | 76.80 ± 6.70 | 2.81 ± 1.33 |
| **Positive CTR** | 53.30 ± 13.70 | 15.73 ± 7.20 **** | 82.10 ± 3.50 | 13.03 ± 1.31 **** |

Table S5: Results of the micronuclei test. RPD = Relative Population Doubling. MN = micronuclei. CTR = control. **** = p<0.0001 (difference with respect to the negative CTR sample).

**Section S7**

**Results of the skin irritation test**

The detailed results of the skin irritation test are reported in **Table S6**.

|  |  | **Nanocomposite hydrogel** | | | | | | **Negative CTR** | | | | | | **Positive CTR** | | | |
| --- | --- | --- | --- | --- | --- | --- | --- | --- | --- | --- | --- | --- | --- | --- | --- | --- | --- |
| **Time-point** | **Item** | ***Site 1*** | ***Site 2*** | ***Site 3*** | ***Site 4*** | ***Site 5*** | ***Site 6*** | ***Site 1*** | ***Site 2*** | ***Site 3*** | ***Site 4*** | ***Site 5*** | ***Site 6*** | ***Site 1*** | ***Site 2*** | ***Site 3*** | ***Site 4*** |
| **24 h** | ***erythema*** | 0 | 0 | 0 | 0 | 0 | 0 | 0 | 0 | 0 | 0 | 0 | 0 | 3 | 3 | 3 | 3 |
| ***oedema*** | 0 | 0 | 0 | 0 | 0 | 0 | 0 | 0 | 0 | 0 | 0 | 0 | 2 | 2 | 1 | 1 |
| **48 h** | ***erythema*** | 0 | 0 | 0 | 0 | 0 | 0 | 0 | 0 | 0 | 0 | 0 | 0 | 4 | 4 | 3 | 3 |
| ***oedema*** | 0 | 0 | 0 | 0 | 0 | 0 | 0 | 0 | 0 | 0 | 0 | 0 | 4 | 4 | 3 | 3 |
| **72 h** | ***erythema*** | 0 | 0 | 0 | 0 | 0 | 0 | 0 | 0 | 0 | 0 | 0 | 0 | 4 | 4 | 3 | 3 |
| ***oedema*** | 0 | 0 | 0 | 0 | 0 | 0 | 0 | 0 | 0 | 0 | 0 | 0 | 4 | 4 | 3 | 3 |
| **PII** | | **0** | | | | | | **0** | | | | | | **6.17** | | | |

Table S6: Results of the skin irritation test. PII = Primary Irritation Index.

**Section S8**

**Supplementary Methods**

**S8.1: Assessment of nanomaterial cytotoxicity on human chondrocytes**

Human articular chondrocytes (Cell Applications Inc., Boston, MA, USA) were cultured with Chondrocyte Growth Medium (Cell Applications Inc., Boston, MA, USA). The chondrocytes used for these experiments were at passage numbers smaller than 5. The coated BTNPs and GO nanoflakes at different concentrations (10 μg/mL, 25 μg/mL, 50 μg/mL, and 100 μg/mL) were prepared from stock dispersions (2.5 mg/mL for BTNPs and 5 mg/mL for GO) by diluting each dispersion with the cell culture medium. Then, the dispersions were added to a 48-well plate after 24 h from cell seeding, in which human chondrocytes were previously seeded at a density of 5,000 cells/well. Cells were visualized 24 h after the addition of the nanomaterials in the culture medium. Cells were analyzed through the Live/Dead assay (Invitrogen). Then, cells underwent DNA quantification, metabolic activity assessment and evaluation of LDH release at the 24, 48 and 72 h time-points.

For the Live/Dead assay, the cells were washed with PBS 24 h after seeding, then incubated with calcein AM (2 µM) and ethidium homodimer (4 µM) for 30 min at 37 °C. Then, fluorescence images were acquired with an inverted microscope (Eclipse Ti, FITC-TRITC filters, Nikon Corporation) equipped with a CCD camera (DS-5MC USB2, Nikon Corporation) to discriminate live cells (in green) from dead/necrotic ones (in red).

For DNA quantification, at the desired time-points (24, 48, and 72 h) the cells were washed twice with PBS. Then, they were lysed in distilled water. The DNA amount in the cell lysates was measured using the Quant-iT™ PicoGreen kit (Invitrogen Co., Carlsbad, CA, USA), following the manufacturer’s instructions. DNA amount was proportional to fluorescence intensity, measured with a VICTOR Nivo multimode plate reader (excitation wavelength: 485 nm; emission wavelength: 535 nm). Three independent samples were analyzed for each sample type and for each time-point.

For metabolic activity assessment, at the desired time-points (24, 48, and 72 h) the cells were incubated for 2 h with a 10% solution of PrestoBlue (Thermo Fisher Scientific) in basal culture medium. The resulting supernatant was diluted (1:1) with medium, and fluorescence was measured with a microplate reader (Victor X3, PerkinElmer) at an excitation wavelength of 535 nm and an emission wavelength of 615 nm. Four independent samples were analyzed for each sample type and for each time-point.

For LDH release measurements, at the desired time-points (24, 48, and 72 h) cell culture supernatants (25 μL) were collected and transferred into a new 96-well microplate. Then, the Lactate Dehydrogenase Activity Assay Kit (Sigma-Aldrich) was used according to the manufacturer’s instructions. In this kit, LDH reduces NAD to NADH, which is quantified by colorimetric readings (at 450 nm). Four independent samples were analyzed for each sample type and for each time-point.

**S8.2: Chemical-physical characterization of the nanocomposite hydrogel**

The hydrogels were characterized using Fourier Transform Infrared Spectroscopy (FT-IR). Before FT-IR analysis, samples were freeze-dried using a FreeZone Plus 2.5 Liter Freeze Dry System (Labconco, Kansas City, MO, USA) to remove water. Then, FT-IR spectra were recorded in attenuated total reflection (ATR) mode, using an IRAffinity-1 FT-IR spectrophotometer equipped with an ATR MIRacle-10 accessory (Shimadzu Scientific Instruments, Japan). The spectra were collected in the range 4000 – 600 cm-1 with 4 cm-1 and 16 scan resolution.

The 1H NMR spectra were recorded on a Bruker Ascend 400 at 50 °C, using solutions of lyophilized hydrogel (~5 mg) in 1 mL of D2O.

An MCR 302 rheometer (Anton Paar GmbH, Ostfildern, Germany) equipped with an H-PTD 200 temperature control device was used with a plate–plate geometry (diameter = 25 mm, measure gap height = 1 mm) to perform rheological measurements. The measurements were performed to evaluate the shear elastic modulus G’ and the shear loss modulus G’’, and the shear stress over shear rate (from 0.1 s-1 to 1000 s-1) at 25 °C, also to estimate the shear stress to which cells were exposed during the injection procedure. Each test was conducted on four independent samples for each sample type. To estimate the shear stress, the bioink viscosity was modeled with the following power law:

where η is the dynamic viscosity, is the shear rate of the fluid, and K and n are the consistency index and the flow behavior index, respectively. Through linear interpolation, K and n were determined from the shear rate sweep rheometric curves. Based on these constants and considering the injection parameters such as the inner diameter of the needle (from 18G to 24 G) and flow rate (Q = 5.8 mm/s, following EN ISO 7886‑1:2018), the shear stress τ was estimated as follows:

Uniaxial compression tests were performed using a traction test machine (Instron 2444), applying a compression rate of 1 mm/s. Before mechanical characterization, the samples were kept in PBS at 37 °C for 24 h. The compressive elastic modulus (E) was calculated from the linear region of the strain-stress curve (initial 10% of the linear region) as follows:

𝐸 =

where σ is the stress and ε is the strain.

Tribological measurements on the crosslinked hydrogels were performed using the MCR 102 rheometer (Anton Paar) equipped with the Tribocell T-PTD200 and Peltier temperature control, the H-PTD200 hood and a disposable measuring system shaft. The test geometry was set as flat-on-flat, in which a glass disc mounted on the shaft was interfaced to the hydrogel surface, exposed to PBS or artificial synovial fluid solution, according to the ISO 14243. The glass disc was pressed against the sample with a normal force of 0.1 N. The coefficient of friction (COF) was determined as the ratio between the frictional force and the normal force, analyzing the third extended Stribeck curve runs obtained by increasing the rotational logarithmically from 10−5 to 102 min−1. The wear, intended as the variation of the COF over time, was evaluated at a constant rotation speed (v = 5 min−1) for 30 min. During all experiments, the temperature was kept at 37 °C.

The degradation of the crosslinked hydrogels over time was evaluated by incubating each sample at 37 °C in PBS (1×), in PBS with lysozyme (120 µg/mL) to mimic OA conditions7,8, and in artificial synovial fluid, prepared according to the ISO 14243. The material degradation kinetics was evaluated by monitoring the weight loss percentage at different time-points (15, 30, 60 and 90 days). Five independent samples for each material type were tested.

**S8.3: Controlled ultrasound stimulation**

Two US systems, one for 38 kHz low-frequency stimulation and the other one for high-frequencies (1 MHz and 5 MHz) stimulation were used in this work (**Fig. 2a,b**).

Both systems included a tank filled with deionized and degassed water maintained at 37 °C thanks to a temperature-controlled water heater (Protonic, Imaging Warehouse), at least one ultrasound transducer positioned at the bottom of the tank, a water-proof, ultrasound-transparent biological sample-retaining system hosting the nanocomposite hydrogels, and an upper pyramidal-shaped acoustic absorber (Aptflex F28P, Precision Acoustics) for preventing undesired acoustic reflections along the acoustic path. The low-frequency setup included an ultrasound transducer having a 38 kHz central frequency and a 50 mm diameter (BAC s.r.l.), driven by a 2 W signal generator (SIRIO, BAC s.r.l.), whereas the high-frequency system included three 23 mm-diameter piezoceramic transducers (Precision Acoustics) centered at 1 MHz or three 15 mm-diameter piezoceramic transducers (Precision Acoustics) centered at 4 MHz, for stimulating at 1 MHz and 5 MHz, respectively. In the high-frequency system, three independent samples were stimulated in parallel. The high-frequency transducers were driven by a 4-channels signal generator (2 W power per channel, Image Guided Therapy), used to control the electric input signal to the transducers. A fluidic circuit including a degassing vacuum pumped membrane contactor (3M™ Liqui-Cel™) to remove air bubbles and an activated carbon filter (CL6PF5, Omnipure) to minimize contaminants were also used to guarantee a continuous flow (2 L/min) of degassed and cleaned water within the tank.

The biological sample-retaining system (**Extended data Fig. 4a**) guaranteed, on the one hand, total transparency to ultrasound waves by using thin membranes (38 μm, made of Stretchlon® 200) along the acoustic path and, on the other hand, a complete sealing of the internal chambers, thus preventing possible contaminations of the samples9,10.

By using calibrated hydrophones (TC 4034 Reson for 38 kHz, and 2 mm needle, Precision Acoustics, for 1 MHz and 5 MHz) all the transducers used in the study were characterized in terms of normalized peak-to-peak pressure field maps and intensity calibrations as a function of the output signal voltage provided by the generator.

During the *in vitro* experiments, samples were positioned in the far-field (*i.e.*, 25 mm for 38 kHz, 100 mm for 1 MHz and 150 mm for 5 MHz), where the ultrasonic field was entirely homogeneous. For moving the biological sample-retaining system along the axial direction of the ultrasound transducer, a linear rail (Z-Axis Scaled Post Unit, MISUMI) was used in the high-frequency setup.

**S8.4: FEM simulations** **of the BTNP – US wave interaction**

FEM analyses were carried out using COMSOL Multiphysics (V6.0), run on a MacBook Pro M1 Max ARM64 processor, with 64 GB RAM. The COMSOL “MEMS” and “Acoustics” modules were chosen to include the relevant physics of the acoustic pressure wave and the piezoelectric and dielectric response of the BTNP. Electrostatics and solid mechanics elements of these modules presented a fully coupled steady state solution. The physics were fully coupled using the Multiphysics environment of COMSOL and the steady-state solutions (frequency domain solver) for electric field, charge density, and stress and strain were solved as a function of pressure.

We initially verified that the radially poled configuration (physically more realistic for nanoparticles) developed the same piezo potential as uniaxially poled BTNPs. Thus, the radially poled configuration was used for subsequent analyses, adopting a spherical coordinate system. Linear piezo response and linear elastic media assumptions were also adopted in the study, though, in reality, the non-linear visco-elastic properties of the intracellular material would likely have a minor influence on the acoustic-electrical response of the system. Piezoelectric strain-charge formulation was used to solve for the piezoelectric response to stresses and strains induced by the acoustic field.

The input parameters for the FEM simulations were the following: BTNPs: density (ρ) = 5,700 kg/m3, elastic modulus (E) = 70 GPa, εr = 1,115, dh = 26.5 pC/N. Hydrogel: c = 1,520 m/s, ρ = 1,020 kg/m3, εr = 50, E = 2 kPa11,12. Cell: diameter = 13 μm, r = 1,050 kg/m3, εr = 60, E = 10 kPa13,14. The external pressure was set as an acoustic plane wave of amplitude 0-61 kPa, propagating in direction (xyz) [110] for simulating the stimulation at 125 mW/cm2, 0-86 kPa for 250 mW/cm2 and 0-122 kPa for 500 mW/cm2.

The 17 BTNP clusters were randomly distributed inside the cell area and the particles were arranged in an approximated cubic close packing configuration. Perfectly Matched Layers (PML) were set as appropriate boundaries with dimensions scaled to cell size and the wavelength of the acoustic radiation. Initial conditions included zero applied (background) pressure, and electrically grounded external hydrogel boundaries. Acoustic frequency was set at 1 MHz. The three components (BTNP clusters, cell, hydrogel exterior volume) were meshed using automatic meshing routines within COMSOL that provided a reasonable compromise between spatial resolution and computational time. The final modeled system is shown in **Fig. S4**. A parametric solution was sought, with change in pressure being the variable parameter (**Supplementary video 4**). A variety of domain probes were set up to record the maximum voltage, minimum voltage and average voltages developed within the system.


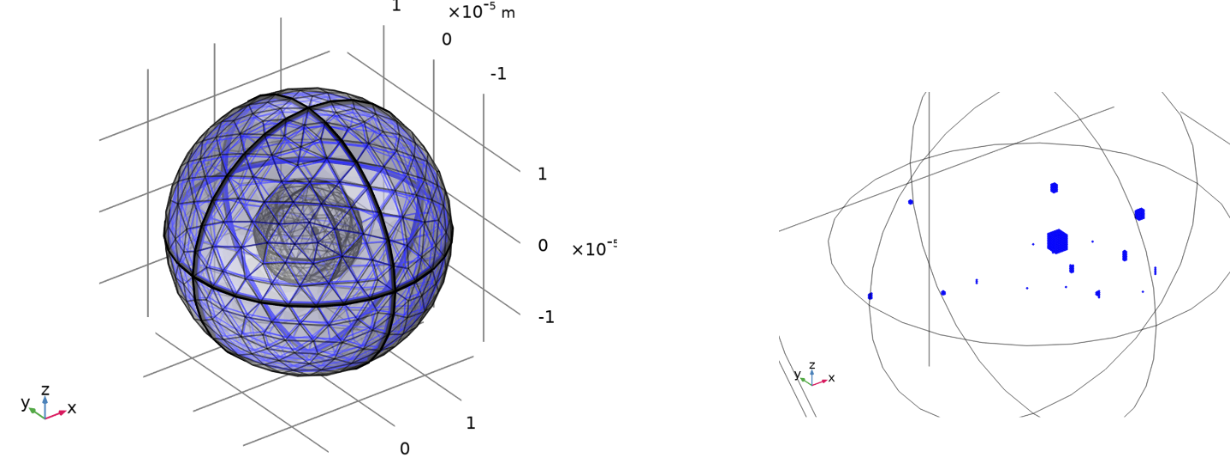


Fig. S4: Finite element mesh created for the BTNP clusters within the cell, which is contained in the hydrogel volume (left). The clusters are shown on one plane in a randomized distribution of the clusters derived from TEM investigations (right).

**S8.5: RNA isolation and quantitative PCR**

The list of the oligonucleotide primers used for real-time PCR is reported in **Table S8**, together with their efficiency.

| **Target Gene** | **Primers (forward and reverse)** | **Product size (bp)** | **GenBank Accession**  **No.** | **Primer**  **Efficiency (%)** |
| --- | --- | --- | --- | --- |
| ***ACAN*** | TCGAGGACAGCGAGGCC  TCGAGGGTGTAGCGTGTAGAGA | 85 | NM_001135 | 96.5 |
| ***COL1A1*** | CCTGGATGCCATCAAAGTCT  CGCCATACTCGAACTGGAAT | 170 | NM_000088 | 95.4 |
| ***COL2A1*** | GACAATCTGGCTCCCAAC  ACAGTCTTGCCCCACTTAC | 228 | NM_001844 | 98.1 |
| ***COL10A1*** | TGCTGCCACAAATACCCTTT GTGGACCAGGAGTACCTTGC | 192 | NM_000493 | 96.8 |
| ***MMP13*** | TCACGATGGCATTGCT GCCGGTGTAGGTGTAGA | 277 | NM_002427 | 92.5 |
| ***TIMP1*** | CGGTTCGTCTACACCC CACAAGCAATGAGTGCC | 266 | NM_003254.2 | 112.6 |
| ***MKI67*** | TCTGGTAATGCACACTCCACC  GCTTTGTGCCTTCACTTCCAC | 112 | NM_002417 | 98.1 |
| ***SOX9*** | GAGCAGACGCACATCTC  CCTGGGATTGCCCCGA | 281 | NM_000346 | 97.2 |
| ***GAPDH*** | CGGAGTCAACGGATTTGG CCTGGAAGATGGTGATGG | 218 | NM_002046 | 101.9 |

**Table S8:** Oligonucleotide primers used for real-time PCR.

**S8.6: Proteomic analysis, liquid chromatography-Tandem mass spectrometry (LC-MS/MS) and bioinformatic analysis**

*Protein extraction*

The total proteins were extracted from samples by adding 50 μL of lysis buffer containing Benzonase, NaF, Na3VO4, PMSF, and Protease Inhibitor cocktail. Then samples were immediately snap frozen in liquid nitrogen (-196 °C) and homogenized with a motor cordless micropestel in ice at 4 °C. After homogenization, the supernatants were centrifugated at 7,000 xg for 15 min at 4 °C, and stored at -80 °C. The proteins in each sample were quantified by using a Pierce™ BCA Protein Assay Kit. Equal amounts of proteins from each sample were precipitated in four times the volume of 100% cold acetone and mixed gently. The mixture was kept at -20 °C overnight. The samples were centrifuged at 4,000 xg for 15 min. The supernatant was removed, then the pellet was washed three times with 1 mL of 70% ice-cold acetone. The supernatant was discarded and the pellet air-dried. Each pellet was dissolved in 50 μL of 6 M urea/200 mM ammonium bicarbonate and digested with trypsin (1:30 w/w, enzyme/substrate) (Thermo) at 37 °C for 4 h with shaking at 850 rpm. Samples were reduced with DTT (10 mM, 1 h, 37 °C) and alkylated in the dark with IAA (20 mM, 15 min, RT). Trypsin was added to the ratio 1:100 (w/w, enzyme/substrate) in 50 mM ammonium bicarbonate and left overnight at 37 °C. The digested protein samples were purified by C18 column (EmporeTM, Sigma Aldrich, Milan, IT), according to the manual. Briefly, the C18 column was activated by 100% acetonitrile (ACN) and stabilized by 70% ACN/0.1% formic acid (FA). Then, the samples were loaded into the column and centrifuged at 200 xg for 3 min. Peptides were washed with 0.1% TFA and subsequently eluted with 70% ACN. The eluted samples were dried up by Speed-vac.

*Liquid chromatography-Tandem mass spectrometry (LC-MS/MS)*

Samples were analyzed using a QExactive Hybrid Quadrupole-Orbitrap Mass Spectrometer (Thermo Scientific, Waltham, MA, USA), coupled online with a UHPL ultimate 3000 system. Peptides were separated on a 10 cm C18 Hypersil gold column (Thermo Scientific, Milan, IT) with a gradient from 2 to 28 acetonitrile in 150 min. The column was maintained at 30 °C and the adopted flow rate was 0.3 mL/min. The acquisition was performed in data-dependent acquisition mode and full MS scans were acquired in the Orbitrap. In each cycle, the top 12 most intense ions were selected for fragmentation. Fragment ion spectra were produced through collision-induced dissociation in normalized collision energy of 28% and they were acquired in the ion trap mass analyzer.

*Data analysis*

Raw ms/ms data were converted by msConvert ProteoWizard (v.3.0.19239) to a MGF file using default settings and uploaded to the MASCOT server (v.2.7.0) for MS/MS Ion Search. The search was performed using the SwissProt database (2022_02) restricted to *Homo Sapiens*, and the in-house reverse decoy database (cRAP) was added to calculate the false discovery rate (FDR) due to random match. Furthermore, parameters for identification included: (i) trypsin as an enzyme with 1 of maximum missed cleavage; (ii) mass error tolerances for precursor and fragment ions set to 10 ppm and 0.02 Da, respectively; (iii) peptide charge (2+, 3+, 4+) and (iv) carbamidomethyl cysteine (C) set as fixed modification while deamidation of asparagine and glutamine (NQ) and oxidation of methionine (M) were considered as a dynamic modification. The FDR for protein identification based on sequence homology was set to 1%. We performed label-free quantification using a tandem mass spectra counting approach15, as already described16,17. Briefly, the exponentially modified protein abundance index (emPAI), integrated into Mascot, was calculated as the ratio between the number of experimentally observed peptides per protein and the number of theoretically observable peptides per protein. All emPAI values obtained were normalized, dividing each emPAI value by the sum of all emPAI values18. The expression levels of the proteins identified in Nanocomp – US and Nanocomp + US samples were evaluated by fold changes. For each protein, the fold change was obtained by dividing the emPAI average of Nanocomp + US by that of Nanocomp - US. If the p-value was < 0.05, an expression fold change greater than 3.2 was considered to indicate significant up-regulation, whereas a fold change less than -3 was considered to indicate significant down-regulation.

*Bioinformatic analysis*

Gene Ontology functional annotation was performed using the Functional Enrichment analysis tool FunRich v.3.1.3 (<http://www.funrich.org/>)19. A comparison between the Nanocomp – US and the Nanocomp + US samples was carried out by interrogating the biological process category of the Gene Ontology database and the Reactome Pathway. Results are presented as percentage of proteins belonging to each Gene Ontology term. The Nanocomp + US was further enriched with up- and down-regulated protein plus those proteins solely identified in this dataset and analyzed for significant functional enrichment. Results are presented as fold enrichment with respect to the whole human proteome used as a reference background dataset. Enrichment analysis of Gene Ontology and Reactome Pathway annotation were performed using the Bonferroni method for significance analysis of the comparison between Nanocomp – US/+ US, whereas a Fisher’s exact test was applied to functional enrichment analysis of the Nanocomp – US (as described above). Protein-protein interaction (PPI) information were retrieved from the STRING online software (https://string-db.org/). Cytoscape software (National Resource for Network Biology, United States) with the STRING plugin was used to import and modify network diagrams.

**S8.7: *In vitro* genotoxicity tests and *in vivo* biocompatibility tests**

*In vitro* genotoxicity tests were performed by following ISO 10993-3:2015 (Biological evaluation of medical devices - Part 3: Tests for genotoxicity, carcinogenicity and reproductive toxicity) by applying an integrated platform of *in vitro* tests using both bacteria and mammalian cells: the Ames bacterial reverse mutation assay and the cell micronuclei assay.

The Ames test was performed on six different concentrations of nanocomposite hydrogel and on non disgregated one using the Ames MPF™ Penta II kit (Xenometrix AG, Switzerland) according to the manufacturer's instructions and in compliance with the OECD Guideline 471(OECD (2020), Test No. 471: Bacterial Reverse Mutation Test, OECD Guidelines for the Testing of Chemicals, Section 4, OECD Publishing, Paris, https://doi.org/10.1787/9789264071247-en.). Four *Salmonella typhimurium* strains and one *Escherichia coli* strain were exposed to nanocomposite concentrations or specific positive and negative controls in the absence and presence of metabolic activation (activated rat liver S9 fraction, S9 cofactor kit, Xenometrix AG, Switzerland). After a 90 min exposure and 48 h culture period, revertant colonies were counted and compared to spontaneous revertant colonies of negative controls.

The micronuclei (MN) assay was performed to evaluate the chromosome damaging potential of the nanocomposite hydrogel in human lymphoblastoid TK6 cell line (ATCC, lot 59429029), according to the OECD guideline 487 (2016). Cells were seeded in 6 wells plates at the concentration of 0.25 x 106 cells/mL and maintained in RPMI1640 (10% FBS, 1,500 mg/L sodium bicarbonate, 1 mM sodium pyruvate, 2 mM glutamine, 10 mM hepes, 4,500 mg/L glucose, 1% penicillin-streptomycin). Three different nanocomposite concentrations (1.25X, 1X and 0.75X), negative (fresh medium) and positive (0.5 mg/mL H2O2) controls were added to cells for the short-term and long-term exposure periods of 3 and 24 h, respectively. Then, cells from all wells were recovered, centrifuged, washed and seeded (1 x 105 cells/mL) in 6 well plates for 40 h (recovery time). At the end of incubation, cells were counted to verify population doubling, centrifuged and the pellet was resuspended in 0.075 M KCl hypotonic solution, then twice fixed with a methanol/acetic acid solution (first step: 3:5 v/v; second step: 5:1 v/v). Slides were prepared in duplicate for all material concentrations and controls, stained with 4% Giemsa water solution and digitally acquired by means of a digital slide scanner (Aperio Scanscope CS System, Aperio Technologies, Vista, CA - USA) at the maximum resolution (1781 × 1467 pixels). For this test, experiments were performed in duplicate; the cytotoxic activity of the treatment was measured by calculating the relative population doubling (RPD) as follows:

where:

According to OECD 487, (OECD 2016, Test No. 487: *In Vitro Mammalian Cell Micronucleus Test*, OECD Guidelines for the Testing of Chemicals, Section 4, OECD Publishing, Paris, https://doi.org/10.1787/9789264264861-en), MN were counted at high magnification and reported as MN frequencies.

All *in vivo* procedures were conducted strictly following the Italian Law on animals used for scientific purposes (Law n. 26/2014): the project was authorized by the Italian Ministry of Health (n. 777/2021- PR) on the 3rd November 2021. All animals were purchased by an authorized farm (Charles River Laboratories, Milan, Italy), acclimated for 10 days, housed at a constant temperature of 20-25 °C with a 12/12 h light/dark cycle, and food and water *ad libitum*. After the completion of tests and with the approval of the veterinary doctor, animals were reintegrated in authorized recovery facilities for animals used for scientific purposes.

Skin irritation tests were carried out following ISO 10993-23 (2021). New Zealand SPF white male rabbits (weight 2.6 ± 0.2 kg) for testing the nanocomposite hydrogel, negative and positive controls were used. The dorsal region was shaved and 24 h later, crosslinked test samples (500 µL) and negative controls (500 µL of sterile saline solution) were applied on two sites for each animal, using non-occlusive gauze (2.5 x 2.5 cm) and self-adhesive patches to close the application sites. Positive controls (CTR+) with a known irritant (0.5 g of Sodium lauryl sulphate, Sigma Aldrich, Merck) were included in the test. After 4 h, gauzes and residual materials were gently removed and the treated sites were scored for erythema and oedema at 1, 24, 48 and 72 h. The Primary Irritation Index (PII) (minimum 0- maximum 8) was calculated according to the ISO 10993-23 standard.

Acute systemic toxicity tests were carried out following ISO 10993-11 (2018) by single dose exposure. Ten Sprague Dawley male rats (weight 341 ± 15 g) were used to test the nanocomposite hydrogel in comparison with negative control. Intramuscular injections of 0.15 mL nanocomposite hydrogel or physiological solution (negative control group) in the left thigh were performed for each animal. Clinical observations, signs of illness, pain, injury at the main apparatuses and systems, any behavioral alteration, and weight, water and food intake measurements were registered at baseline and 24, 48, 72 h after treatments.

Delayed type hypersensitivity tests were carried out following ISO 10993-10 (2013) by performing the maximization test. Dunkin Hartley guinea pigs of both sexes (weight of males: 392 ± 17 g; weight of females: 367 ± 13 g) were used and allocated into three groups to test the nanocomposite hydrogel, positive and negative controls. The preliminary phase determined the optimal dose of the nanocomposite hydrogel for the following phases causing mild to moderate erythema for the topical administration and no erythema for the challenge phase, without adversely affecting animals’ status. In the induction phase, animals received three pairs of 0.1 mL intradermal injections on the dorsum of the following compounds: A) Freund’s complete adjuvant solution (FCA, Sigma-Aldrich, Merck); B) nanocomposite hydrogel; C) nanocomposite hydrogel in a 1:1 mixture (v/v) FCA. Animals of negative and positive control groups received in B) and C) sites physiological solution or 5% α- hexyl cinnamaldehyde (Sigma-Aldrich, Merck ), respectively. After 7 days, patches (2 x 4 cm) soaked in the nanocomposite hydrogel for test group, neat α-hexyl cinnamaldehyde or saline solution for positive and negative control groups were applied over B) sites for 48 h. The challenge phase started two weeks after topical applications. Patches with the same materials were applied to the left flank of each animal for 24 h. Finally, erythema and oedema were scored by Magnusson and Kligman grading scale 24 h and 48 h after patches removal. The scores were: 0 = no visible change; 1 = discrete or patchy erythema; 2 = moderate, confluent erythema; 3 = intense erythema and swelling20.

**Supplementary Information References**

1. Paci, C. et al. Piezoelectric nanocomposite bioink and ultrasound stimulation modulate early skeletal myogenesis. *Biomater. Sci.* **10**, 5265-5283 (2022).
2. Vannozzi, L. et al. Graphene oxide and reduced graphene oxide nanoflakes coated with glycol chitosan, propylene glycol alginate, and polydopamine: characterization and cytotoxicity in human chondrocytes. *Nanomaterials* **11**, 2105 (2021).
3. Damjanovic, D., & Demartin, M. The Rayleigh law in piezoelectric ceramics. *J. Phys. D: Appl. Phys.* **29**, 2057 (1996).
4. Marino, A. et al. Piezoelectric nanoparticle-assisted wireless neuronal stimulation. *ACS Nano* **9**, 7678-7689 (2015).
5. Kench, S., & Cooper, S.J. Generating three-dimensional structures from a two-dimensional slice with generative adversarial network-based dimensionality expansion. *Nat. Mach. Intell.* **3**, 299-305 (2021).
6. Du, S., Liang, C., Sun, Y., Ma, B., Gao, W., & Geng, W. The attenuating effect of low-intensity pulsed ultrasound on hypoxia-induced rat chondrocyte damage in TMJ osteoarthritis based on TMT labeling quantitative proteomic analysis. *Front. Pharmacol.* **12**, 752734 (2021).
7. Bennett, R.M., & Skosey, J.L. Lactoferrin and lysozyme levels in synovial fluid. *Arthritis Rheumatol.* **20**, 84-90 (1977).
8. Go, G. et al. Human adipose–derived mesenchymal stem cell–based medical microrobot system for knee cartilage regeneration in vivo. *Sci. Robot.* **5**, eaay6626 (2020).
9. Fontana, F. et al. Development and validation of low-intensity pulsed ultrasound systems for highly controlled in vitro cell stimulation. *Ultrasonics* **116**, 106495 (2021).
10. Ricotti, L., Fontana, F, Pratellesi, T, & Cafarelli, A. *Cell culture support for controlled ultrasonic stimulation*. Patent no. WO/2021/014331, Publication date: 28/01/2021. Priority date: 20/07/2020.
11. Walker, E., Reyes, D., Krokhin, A., & Neogi, A. Anomalous temperature dependence of speed of sound of bulk poly (N-isopropylacrylamide) hydrogels near the phase transition. *Ultrasonics* **54**, 1337-1340 (2014).
12. Richbourg, N.R. et al. Precise control of synthetic hydrogel network structure via linear, independent synthesis-swelling relationships. *Sci. Adv.* **7**, eabe3245 (2021).
13. Zimmermann, J., Distler, T., Boccaccini, A.R., & van Rienen, U. Numerical simulations as means for tailoring electrically conductive hydrogels towards cartilage tissue engineering by electrical stimulation. *Molecules* **25**, 4750 (2020).
14. Strohm, E.M., & Kolios, M.C. Sound speed estimation in single cells using the ultrasound backscatter power spectrum. *Proc. Meet. Acoust.* **19**, 075012 (2013).
15. Ishihama, Y. et al. Exponentially modified protein abundance index (emPAI) for estimation of absolute protein amount in proteomics by the number of sequenced peptides per protein. *Mol. Cell. Proteom.* **4**, 1265-1272 (2005).
16. Lofaro, F.D., Boraldi, F., Garcia-Fernandez, M., Estrella, L., Valdivielso, P., & Quaglino, D. Relationship between mitochondrial structure and bioenergetics in Pseudoxanthoma elasticum dermal fibroblasts. *Front. Cell Dev. Biol.* **8**, 610266 (2020).
17. Ternan, N.G., Jain, S., Graham, R.L., & McMullan, G. Semiquantitative analysis of clinical heat stress in Clostridium difficile strain 630 using a GeLC/MS workflow with emPAI quantitation. *PloS One* **9**, e88960 (2014).
18. Arike, L., & Peil, L. *Spectral counting label-free proteomics*. In: Shotgun proteomics, Humana Press, New York, 213-222 (2014).
19. Pathan, M. et al. FunRich: An open access standalone functional enrichment and interaction network analysis tool. *Proteomics* **15**, 2597-2601 (2015).
20. Magnusson, B. The identification of contact allergens by animal assay. The guinea pig maximization test. *J. Invest. Dermatol.* **52**, 268-276 (1969).
